# Supplementary material for: Single-walled carbon nanotubes increase pandemic influenza A H1N1 virus infectivity of lung epithelial cells
Source: PubMed Central journal article supplement (PMC4318452; doi:10.1186/s12989-014-0066-0), 2014-12-14
Supplement: 12989_2014_66_MOESM1_ESM.pdf [file 12989_2014_66_MOESM1_ESM.pdf]

**Table S1.** Concentration of metals (in ppb) in media after 24 h of incubation of SWCNTs with RPMI media

| <b>Metal Ion</b> | <b>RPMI media</b> | <b>SG65</b> | <b>SG76</b> | <b>CG200</b> |
|------------------|-------------------|-------------|-------------|--------------|
| Cu               | ND                | ND          | ND          | ND           |
| Zn               | 1405.943          | 1244.323    | 1980.234    | 2113.427     |
| Cr               | ND                | ND          | ND          | ND           |
| Fe               | 114.782           | 73.140      | 179.595     | 98.561       |
| Co               | ND                | 5.430       | ND          | 1.826        |
| Ni               | ND                | ND          | ND          | ND           |
| Sr               | 8.799             | 8.473       | 9.054       | 8.869        |
| Mo               | ND                | 23.819      | 125.621     | 117.284      |
| Ag               | 0.090             | 0.025       | 0.077       | 0.114        |
| Al               | 273.589           | 238.969     | 421.321     | 393.811      |
| Na               | 3111995.646       | 3073128.649 | 2951064.539 | 2953590.844  |
| Mg               | 9696.327          | 9484.667    | 9073.010    | 9047.634     |
| Ca               | 20349.665         | 19238.210   | 20136.259   | 20494.612    |
| K                | 199072.054        | 196172.688  | 188775.004  | 190400.743   |
| Be               | ND                | ND          | ND          | ND           |
| As               | ND                | ND          | ND          | ND           |
| Cd               | ND                | ND          | ND          | ND           |
| Ba               | 102.476           | 89.360      | 97.837      | 98.182       |
| Ce               | 0.175             | 0.213       | 0.631       | 0.228        |
| Ti               | ND                | ND          | ND          | ND           |
| Pb               | ND                | ND          | ND          | ND           |
| Th               | ND                | ND          | ND          | ND           |
| U                | ND                | ND          | ND          | ND           |
| V                | ND                | ND          | ND          | ND           |

ND = non detect
